# Supplementary material for: Novel hybrids derived from aspirin and chalcones potently suppress colorectal cancer in vitro and in vivo
Source: Royal Society of Chemistry journal article supplement (doi:10.1039/c8md00284c), 2018-01-01

## **Novel hybrids derived from aspirin and chalcones potently suppress colorectal cancer in vitro and in vivo**

Shan Lu,<sup>a,\*</sup> Obinna N Obianom,<sup>b</sup> Yong Ai<sup>b,\*\*</sup>

*<sup>a</sup>College of Pharmacy, Hubei University of Chinese Medicine, Hubei 430065, PR China*

*<sup>b</sup>Department of Pharmaceutical Sciences, University of Maryland School of Pharmacy, Baltimore, MD 21201, United States*

\* Corresponding author, College of Pharmacy, Hubei University of Chinese Medicine, Hubei 430065, PR China. E-mail address: lushan9805@163.com (S. Lu).

\*\* Corresponding author, Department of Pharmaceutical Sciences, University of Maryland School of Pharmacy, Baltimore, MD 21201, United States. E-mail address: aiyong0508@126.com (Y. Ai).

<sup>1</sup>H NMR data of chalcones **6a-p**.

(*E*)-3-(2-hydroxyphenyl)-1-(*p*-tolyl)prop-2-en-1-one (**6a**). The title compound was prepared according to the general procedure in 68% yield. <sup>1</sup>H-NMR (400 MHz, DMSO-*d*<sub>6</sub>) δ 10.49 (s, 1H), 8.23-8.13 (m, 3H), 8.00-7.97 (m, 2H), 7.48 (d, *J* = 7.6 Hz, 2H), 7.41 (t, *J* = 6.8, 7.2 Hz, 1H), 7.10 (d, *J* = 7.6 Hz, 1H), 7.01 (t, *J* = 6.8, 7.2 Hz, 1H), 2.50 (s, 3H).

(*E*)-3-(2-hydroxyphenyl)-1-(4-methoxyphenyl)prop-2-en-1-one (**6b**). The title compound was prepared according to the general procedure in 60% yield. <sup>1</sup>H-NMR (400 MHz, DMSO-*d*<sub>6</sub>) δ 10.25 (s, 1H), 8.11 (d, *J* = 8.0 Hz, 2H), 8.02 (d, *J* = 15.6 Hz, 1H), 7.88 (m, 2H), 7.26 (t, *J* = 8.0, 7.6 Hz, 1H), 7.08 (d, *J* = 8.0 Hz, 2H), 6.93 (d, *J* = 8.0 Hz, 1H), 6.87 (t, *J* = 6.8, 7.2 Hz, 1H), 3.85 (s, 3H).

(*E*)-1-(4-chlorophenyl)-3-(2-hydroxyphenyl)prop-2-en-1-one (**6c**). The title compound was prepared according to the general procedure in 65% yield. <sup>1</sup>H-NMR (400 MHz, DMSO-*d*<sub>6</sub>) δ 10.39 (s, 1H), 8.10-8.07 (m, 3H), 7.86-7.80 (m, 2H), 7.58 (d, *J* = 8.4 Hz, 2H), 7.27 (t, *J* = 8.0, 6.8 Hz, 1H), 6.96 (d, *J* = 8.0 Hz, 1H), 6.86 (t, *J* = 7.2, 7.6 Hz, 1H).

(*E*)-1-(4-bromophenyl)-3-(2-hydroxyphenyl)prop-2-en-1-one (**6d**). The title compound was prepared according to the general procedure in 55% yield. <sup>1</sup>H-NMR (400 MHz, DMSO-*d*<sub>6</sub>) δ 10.34 (s, 1H), 8.09-8.05 (m, 3H), 7.90-7.78 (m, 4H), 7.29 (t, *J* = 8.0 Hz, 1H), 6.95 (d, *J* = 8.0 Hz, 1H), 6.89 (t, *J* = 6.8 Hz, 1H).

(*E*)-4-(3-(2-hydroxyphenyl)acryloyl)benzonitrile (**6e**). The title compound was prepared according to the general procedure in 50% yield. <sup>1</sup>H-NMR (400 MHz, DMSO-*d*<sub>6</sub>) δ 10.39 (s, 1H), 8.25 (d, *J* = 7.6 Hz, 2H), 8.12-8.05 (m, 3H), 7.92-7.85 (m, 2H), 7.31 (t, *J* = 7.6, 8.0 Hz, 1H), 6.95 (d, *J* = 8.0 Hz, 1H), 6.89 (t, *J* = 7.6, 7.2 Hz, 1H).

(*E*)-3-(2-hydroxyphenyl)-1-(4-nitrophenyl)prop-2-en-1-one (**6f**). The title compound was prepared according to the general procedure in 44% yield. <sup>1</sup>H-NMR (400 MHz,

DMSO- $d_6$ )  $\delta$  10.44 (s, 1H), 8.35-8.26 (m, 4H), 8.08 (d,  $J$  = 14.6 Hz, 1H), 7.86-7.82 (m, 2H), 7.29 (t,  $J$  = 6.4 Hz, 1H), 6.96-6.88 (m, 2H).

(*E*)-1-(4-chlorophenyl)-3-(2-hydroxy-4-methoxyphenyl)prop-2-en-1-one (**6g**). The title compound was prepared according to the general procedure in 47% yield.  $^1\text{H-NMR}$  (400 MHz, DMSO- $d_6$ )  $\delta$  10.43 (s, 1H), 8.08 (d,  $J$  = 8.0 Hz, 2H), 8.0 (d,  $J$  = 15.6 Hz, 1H), 7.82 (d,  $J$  = 8.0 Hz, 1H), 7.70 (d,  $J$  = 15.6 Hz, 1H), 7.60 (d,  $J$  = 8.0 Hz, 2H), 6.49-6.47 (m, 2H), 3.75 (s, 3H).

(*E*)-1-(4-chlorophenyl)-3-(2-hydroxy-5-methoxyphenyl)prop-2-en-1-one (**6h**). The title compound was prepared according to the general procedure in 60% yield.  $^1\text{H-NMR}$  (400 MHz, DMSO- $d_6$ )  $\delta$  9.87 (s, 1H), 8.16 (d,  $J$  = 7.6 Hz, 2H), 8.07 (d,  $J$  = 15.6 Hz, 1H), 7.87 (d,  $J$  = 15.6 Hz, 1H), 7.64 (d,  $J$  = 7.6 Hz, 2H), 7.45 (s, 1H), 6.93-6.86 (m, 2H), 3.78 (s, 3H).

(*E*)-1-(4-chlorophenyl)-3-(5-fluoro-2-hydroxyphenyl)prop-2-en-1-one (**6i**). The title compound was prepared according to the general procedure in 65% yield.  $^1\text{H-NMR}$  (400 MHz, DMSO- $d_6$ )  $\delta$  10.30 (s, 1H), 8.17 (d,  $J$  = 7.6 Hz, 2H), 8.02 (d,  $J$  = 15.6 Hz, 1H), 7.91 (d,  $J$  = 15.6 Hz, 1H), 7.84 (m, 1H), 7.64 (d,  $J$  = 8.0 Hz, 2H), 7.14 (t,  $J$  = 8.0 Hz, 1H), 6.94-6.91 (m, 1H),

(*E*)-3-(5-chloro-2-hydroxyphenyl)-1-(4-chlorophenyl)prop-2-en-1-one (**6j**). The title compound was prepared according to the general procedure in 70% yield.  $^1\text{H-NMR}$  (400 MHz, DMSO- $d_6$ )  $\delta$  10.61 (s, 1H), 8.19 (d,  $J$  = 8.0 Hz, 2H), 8.07-8.04 (m, 1H), 8.00-7.94 (m, 2H), 7.65 (d,  $J$  = 8.0 Hz, 2H), 7.32 (d,  $J$  = 8.0 Hz, 1H), 6.96 (d,  $J$  = 8.0 Hz, 1H).

(*E*)-3-(5-bromo-2-hydroxyphenyl)-1-(4-chlorophenyl)prop-2-en-1-one (**6k**). The title compound was prepared according to the general procedure in 59% yield.  $^1\text{H-NMR}$  (400 MHz, DMSO- $d_6$ )  $\delta$  10.63 (s, 1H), 8.20-8.18 (m, 3H), 8.02-7.92 (m, 2H), 7.64 (d,

$J = 8.0$  Hz, 2H), 7.42 (d,  $J = 8.0$  Hz, 1H), 6.99 (d,  $J = 8.0$  Hz, 1H).

(*E*)-1-(4-chlorophenyl)-3-(2-hydroxy-3-methoxyphenyl)prop-2-en-1-one (**6l**). The title compound was prepared according to the general procedure in 67% yield.  $^1\text{H-NMR}$  (400 MHz, DMSO- $\text{d}_6$ )  $\delta$  9.51 (s, 1H), 8.13-8.07 (m, 3H), 7.82 (d,  $J = 15.6$  Hz, 1H), 7.62 (d,  $J = 8.0$  Hz, 2H), 7.49 (d,  $J = 8.0$  Hz, 1H), 7.04 (d,  $J = 8.0$  Hz, 2H), 6.84 (t,  $J = 8.0$  Hz, 1H), 3.83 (s, 3H).

(*E*)-1-(4-chlorophenyl)-3-(2-hydroxy-5-methylphenyl)prop-2-en-1-one (**6m**). The title compound was prepared according to the general procedure in 65% yield.  $^1\text{H-NMR}$  (400 MHz, DMSO- $\text{d}_6$ )  $\delta$  10.11 (s, 1H), 8.12 (d,  $J = 8.4$  Hz, 2H), 8.04 (d,  $J = 15.6$  Hz, 1H), 7.80 (d,  $J = 15.6$  Hz, 1H), 7.69 (s, 1H), 7.62 (d,  $J = 8.4$  Hz, 2H), 7.08 (d,  $J = 8.0$  Hz, 1H), 6.83 (d,  $J = 8.0$  Hz, 1H), 2.23 (s, 3H).

(*E*)-3-(2-hydroxy-5-methoxyphenyl)-1-(4-methoxyphenyl)prop-2-en-1-one (**6n**). The title compound was prepared according to the general procedure in 70% yield.  $^1\text{H-NMR}$  (400 MHz, DMSO- $\text{d}_6$ )  $\delta$  9.81 (s, 1H), 8.13 (d,  $J = 8.8$  Hz, 2H), 8.00 (d,  $J = 16.0$  Hz, 1H), 7.85 (d,  $J = 16.0$  Hz, 1H), 7.41 (s, 1H), 7.07 (d,  $J = 8.0$  Hz, 2H), 6.90-6.84 (m, 2H), 3.85 (s, 3H), 3.75 (s, 3H).

(*E*)-3-(5-bromo-2-hydroxyphenyl)-1-(4-methoxyphenyl)prop-2-en-1-one (**6o**). The title compound was prepared according to the general procedure in 70% yield.  $^1\text{H-NMR}$  (400 MHz, DMSO- $\text{d}_6$ )  $\delta$  10.61 (s, 1H), 8.15-8.10 (m, 3H), 7.99-7.90 (m, 2H), 7.37 (d,  $J = 8.8$  Hz, 1H), 7.03 (d,  $J = 8.4$  Hz, 2H), 6.90 (d,  $J = 8.4$  Hz, 1H), 3.82 (s, 3H).

(*E*)-3-(5-chloro-2-hydroxyphenyl)-1-(4-methoxyphenyl)prop-2-en-1-one (**6p**). The title compound was prepared according to the general procedure in 70% yield.  $^1\text{H-NMR}$  (400 MHz, DMSO- $\text{d}_6$ )  $\delta$  10.56 (s, 1H), 8.13 (d,  $J = 8.8$  Hz, 2H), 8.00-7.89 (m, 3H), 7.24 (d,  $J = 8.4$  Hz, 1H), 7.02 (d,  $J = 8.4$  Hz, 2H), 6.94 (d,  $J = 8.8$  Hz, 1H), 3.81 (s, 3H).

Spectral copies of  $^1\text{H}$  NMR, and  $^{13}\text{C}$  NMR of compounds **7a-p**

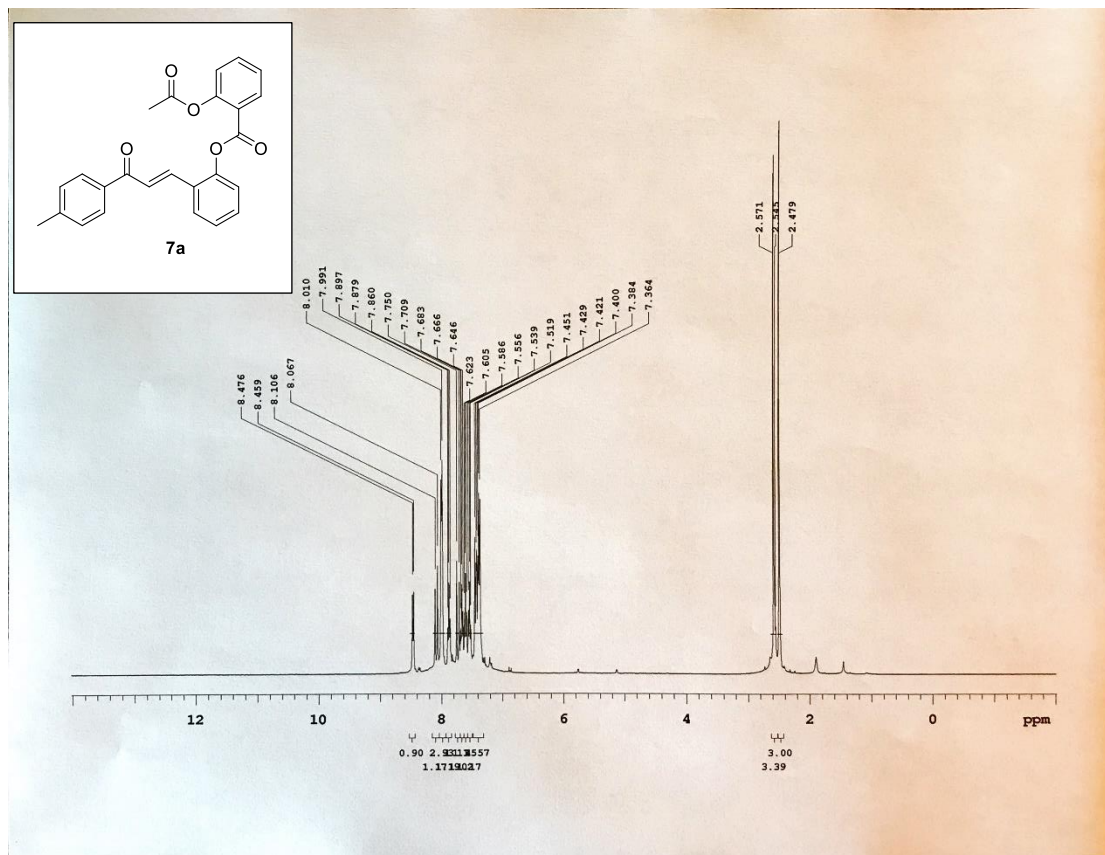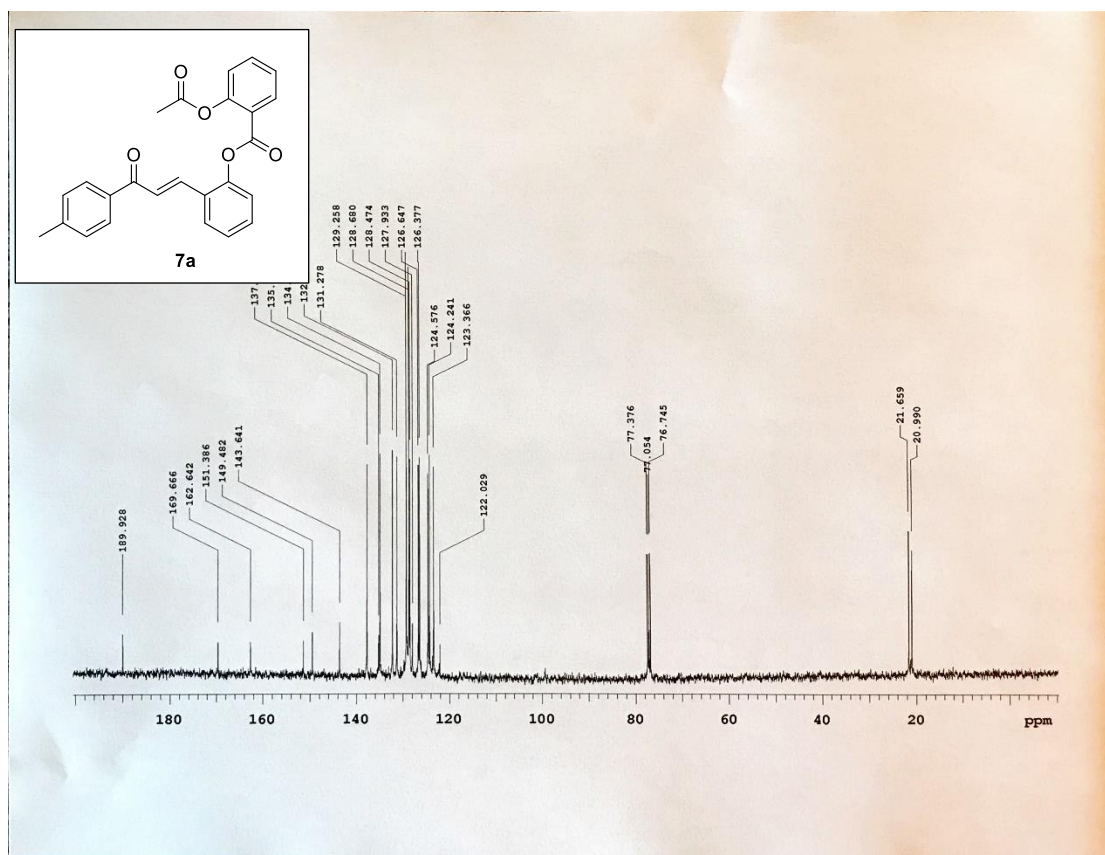

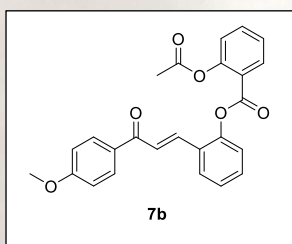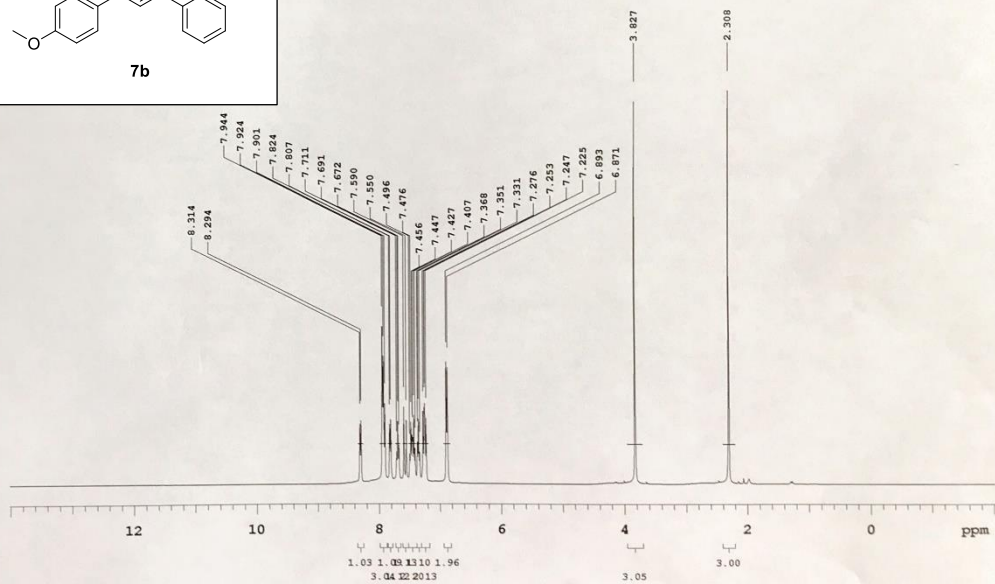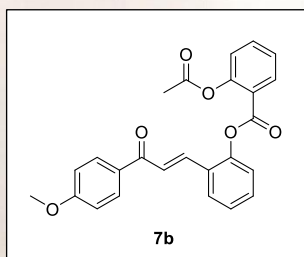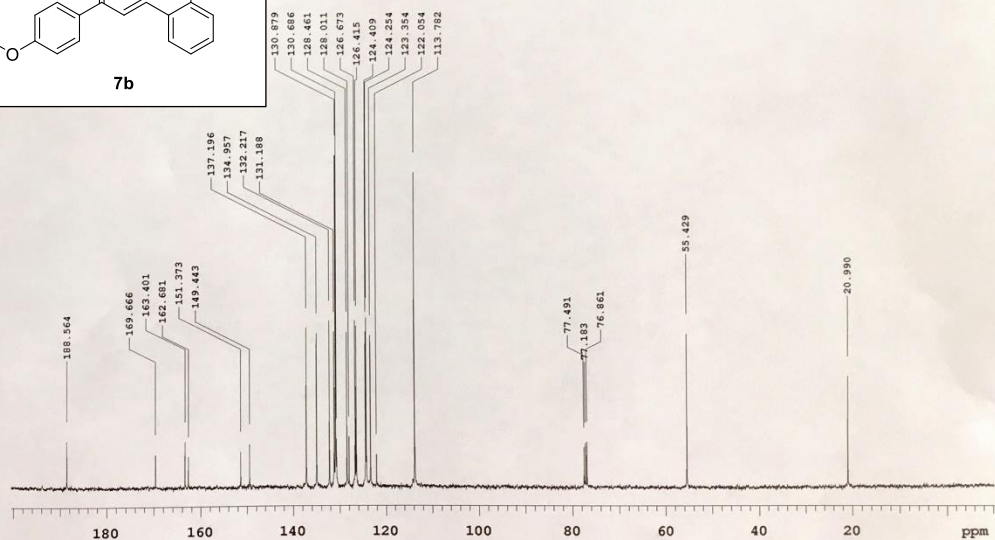



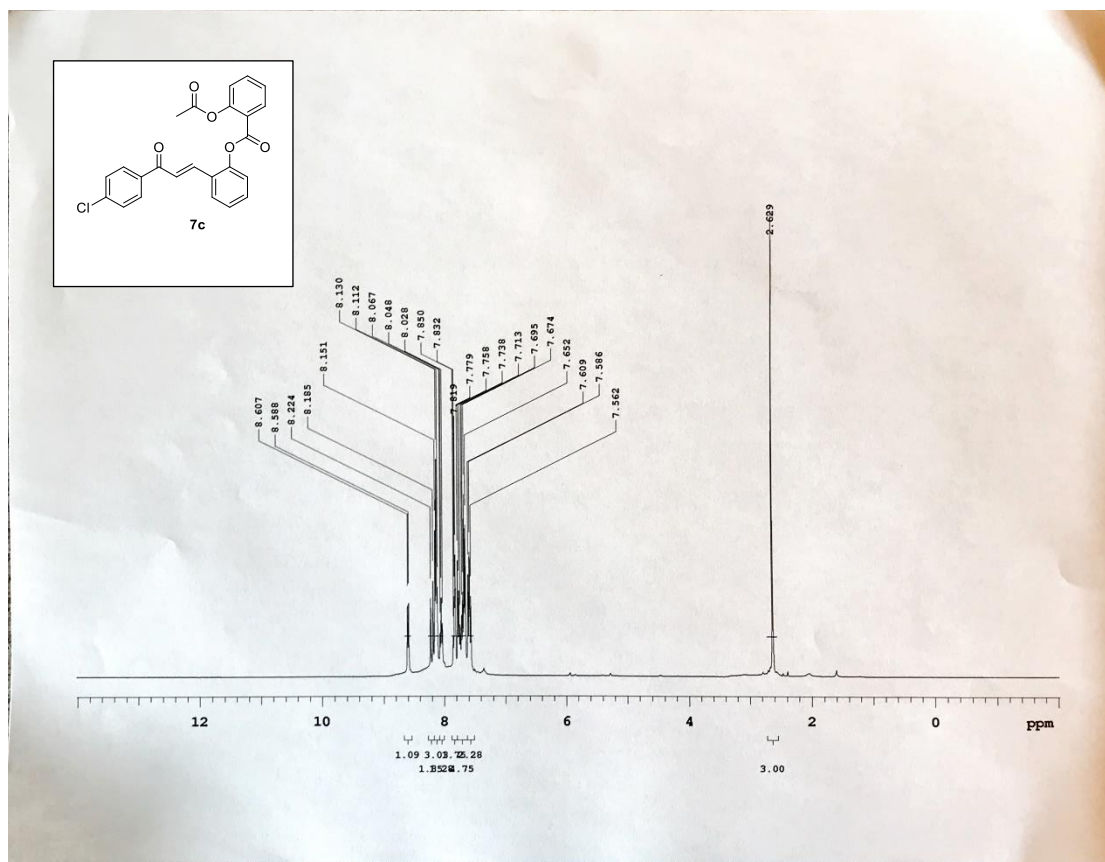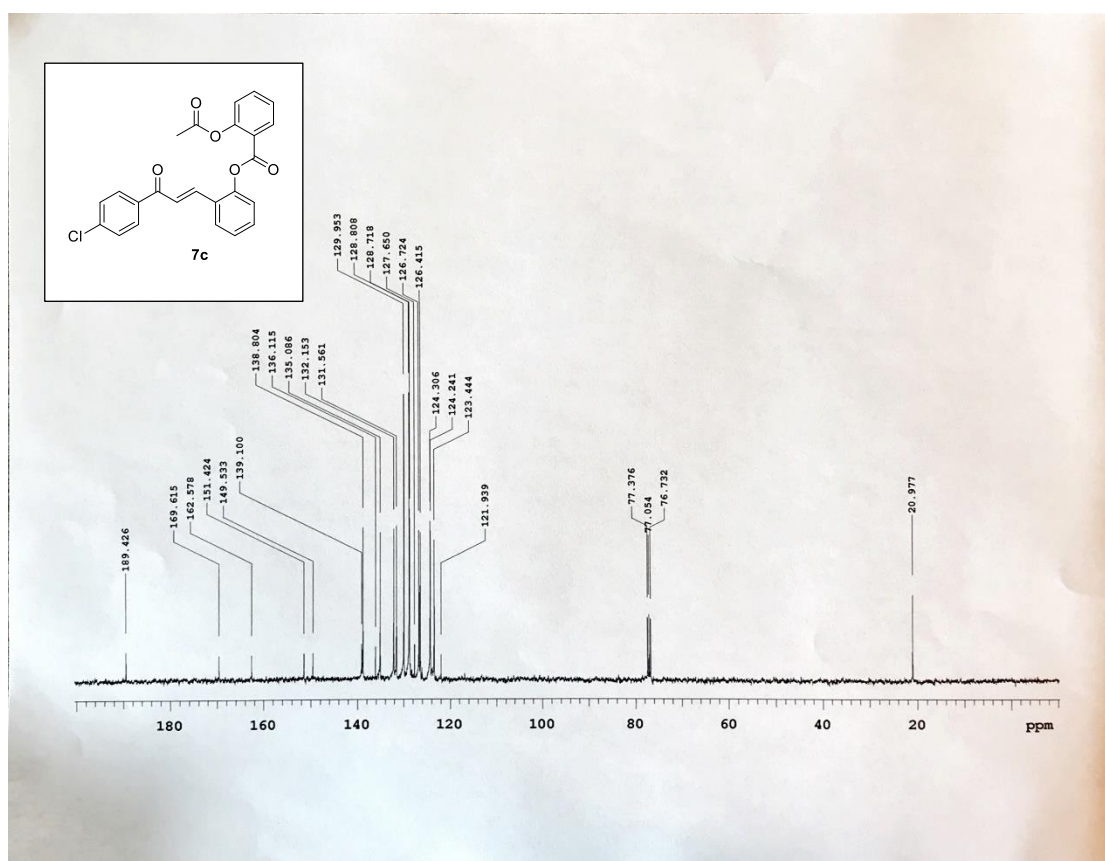

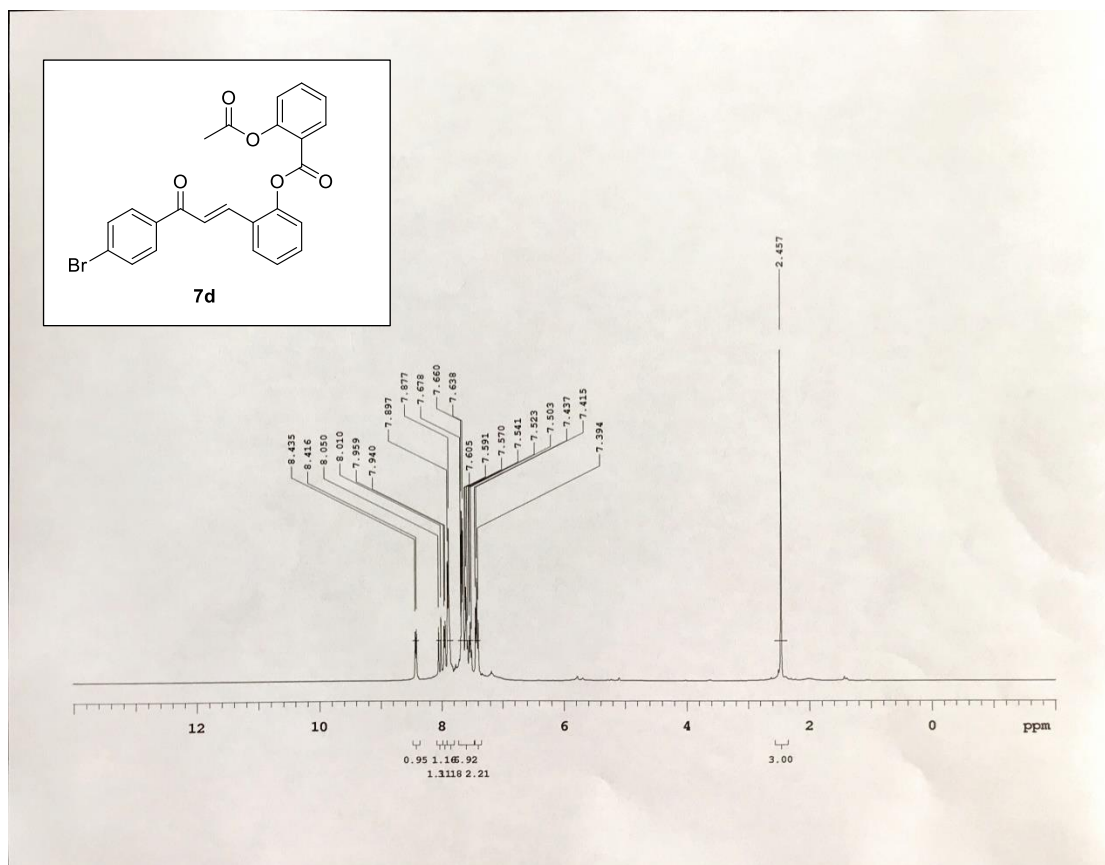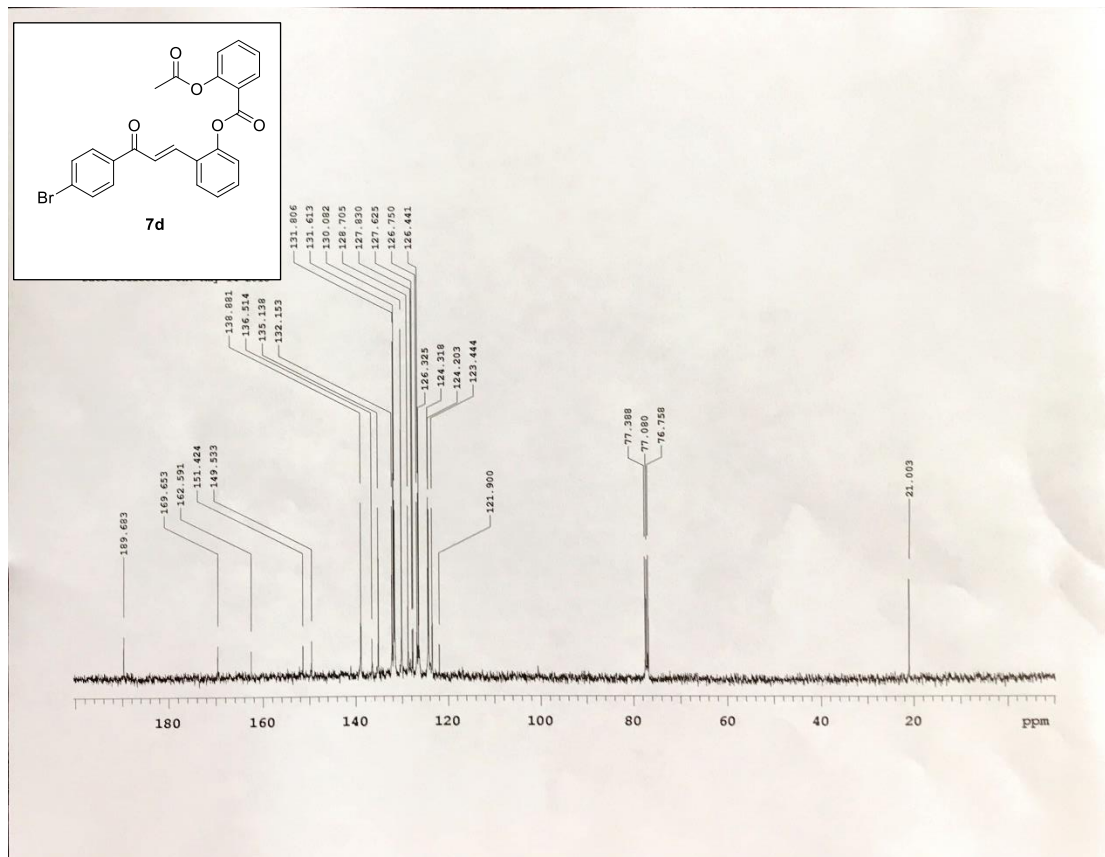



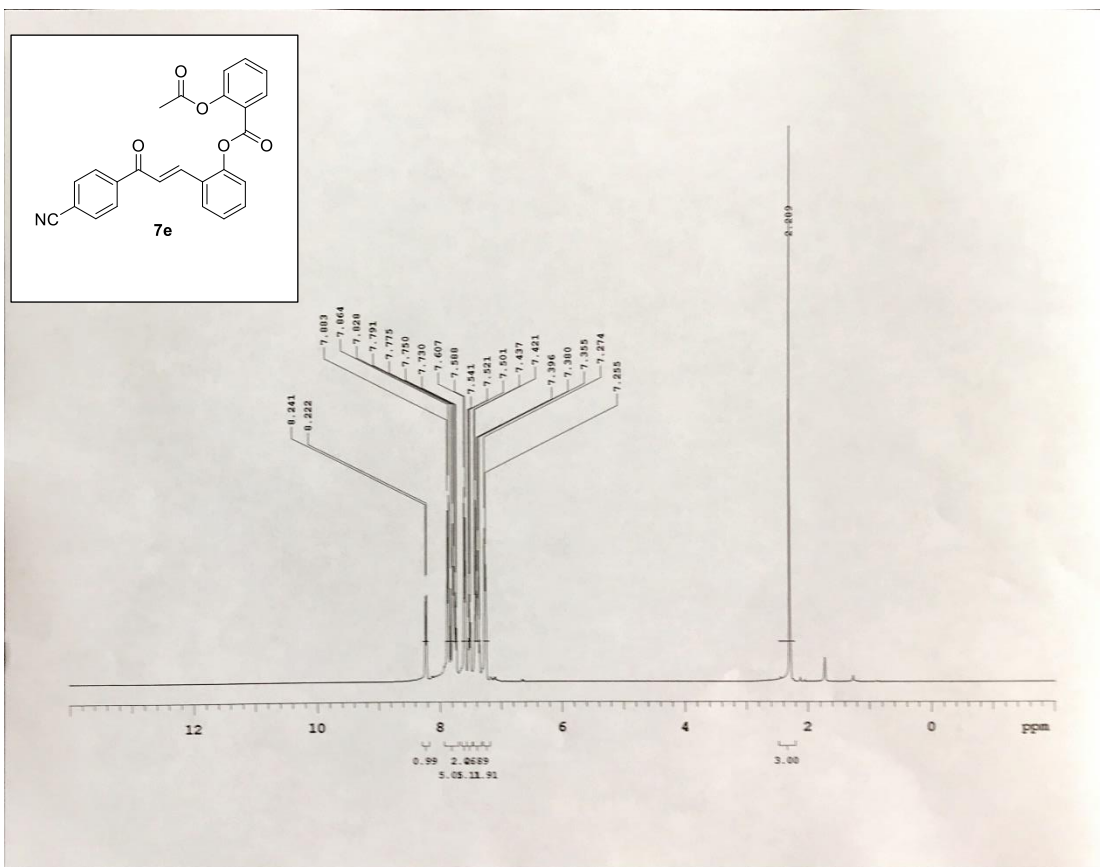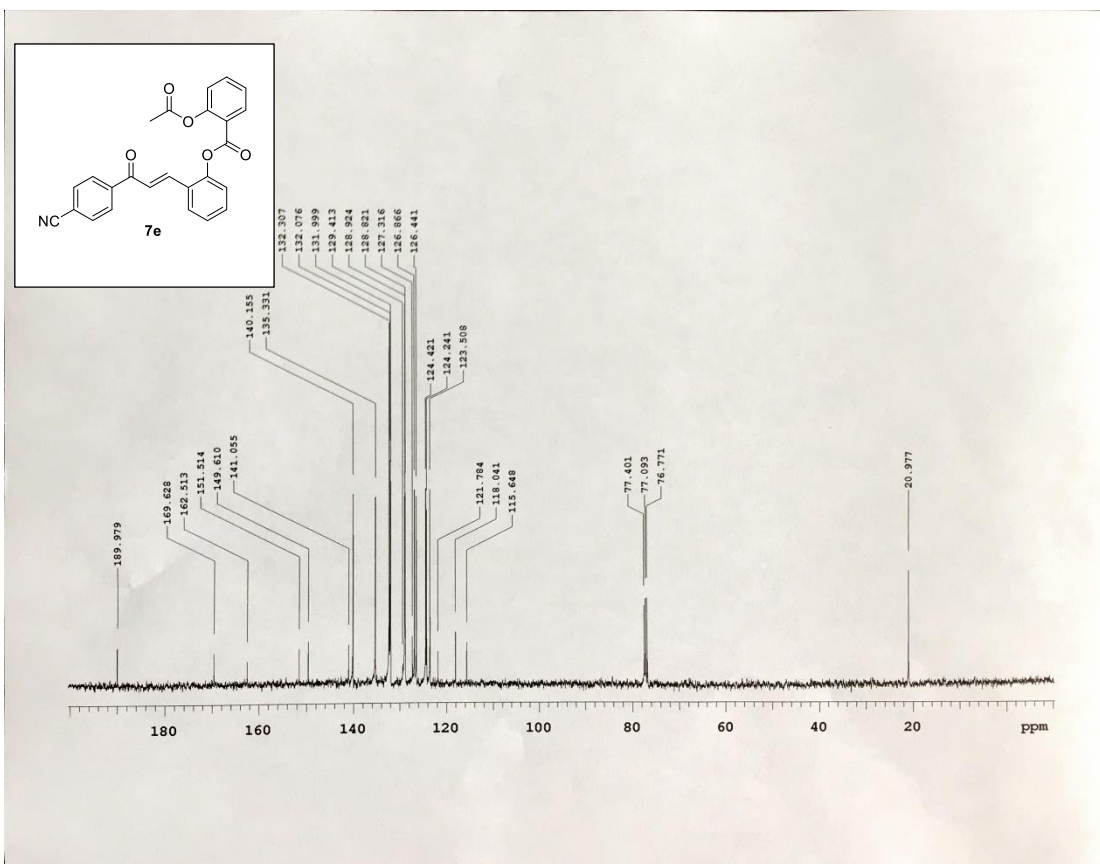

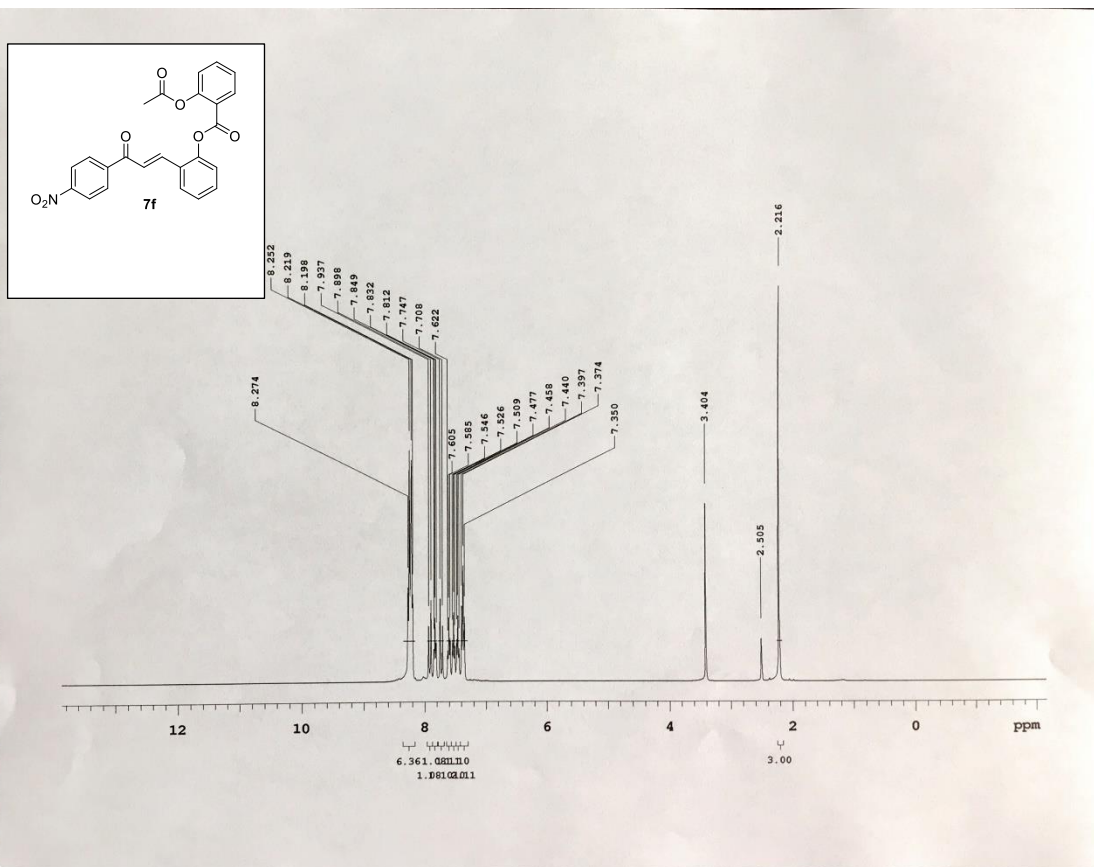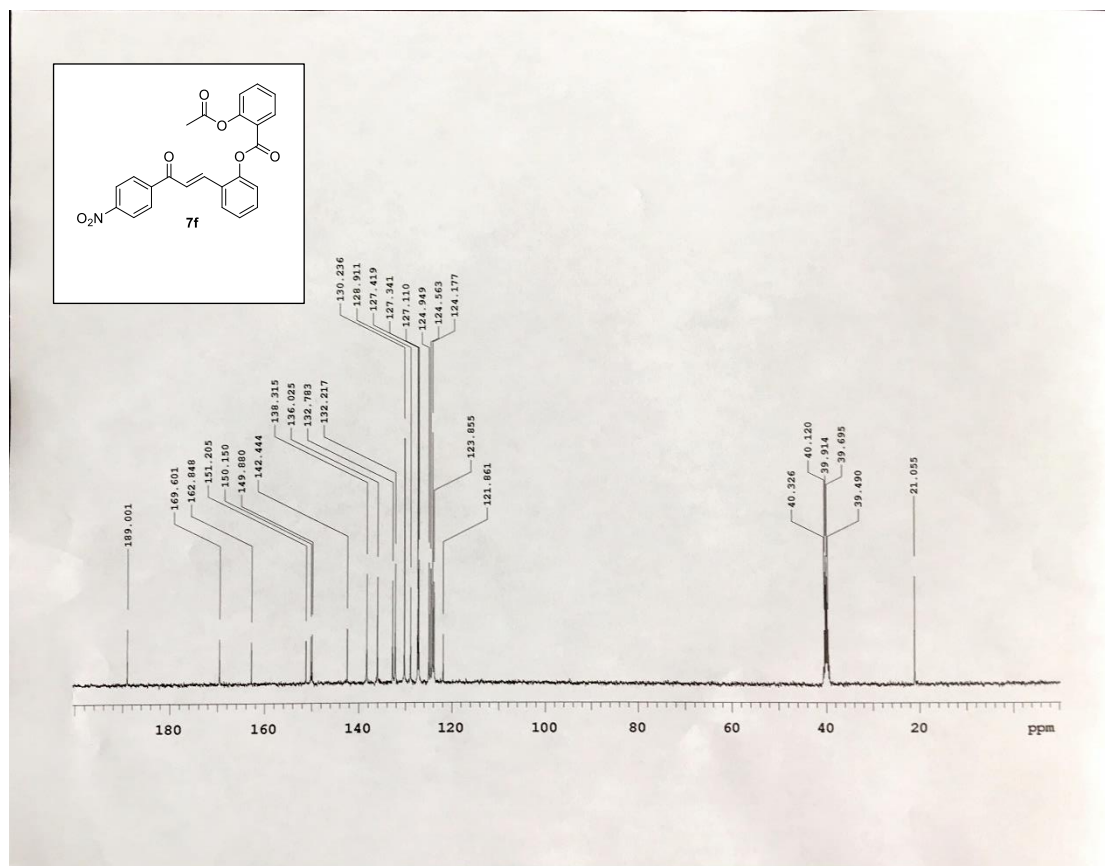

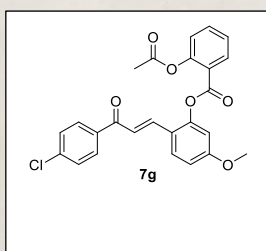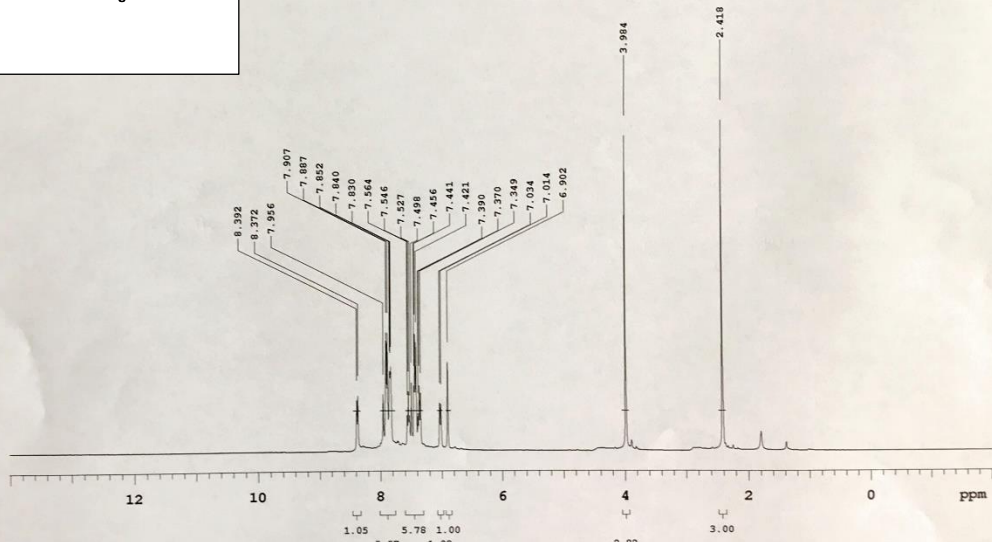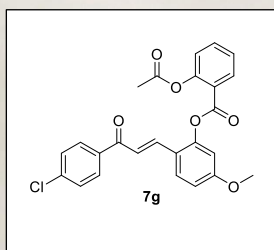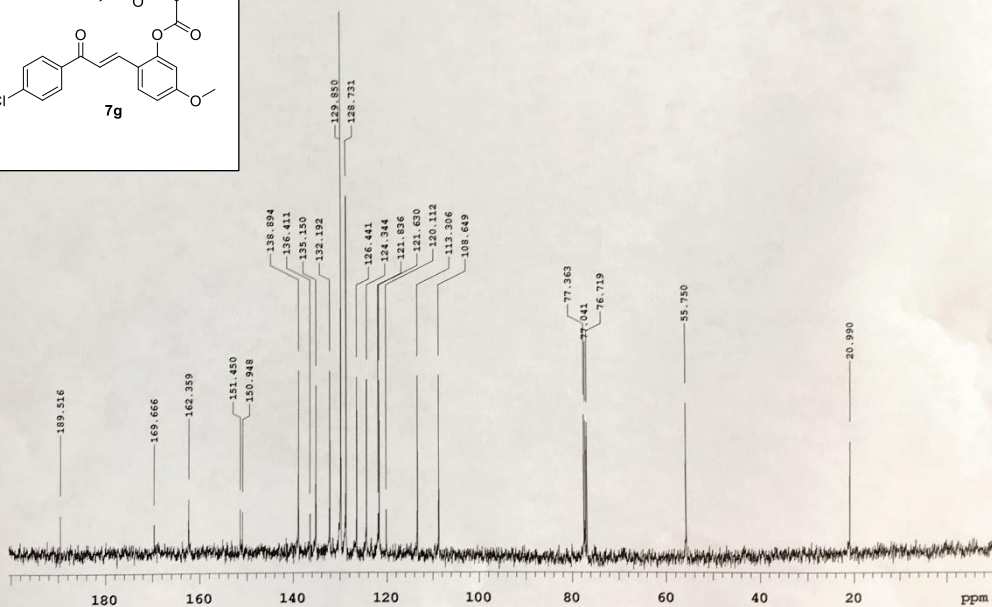

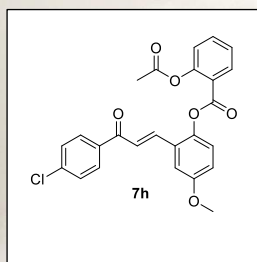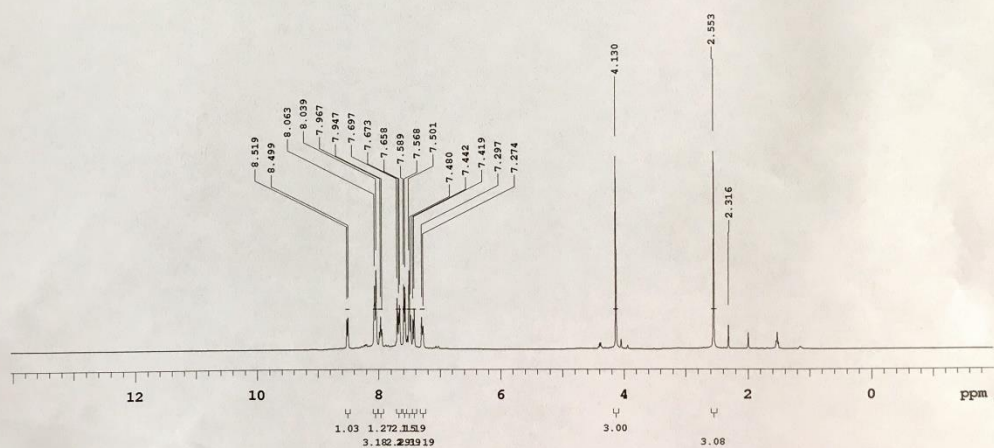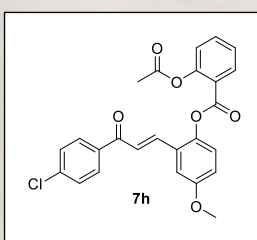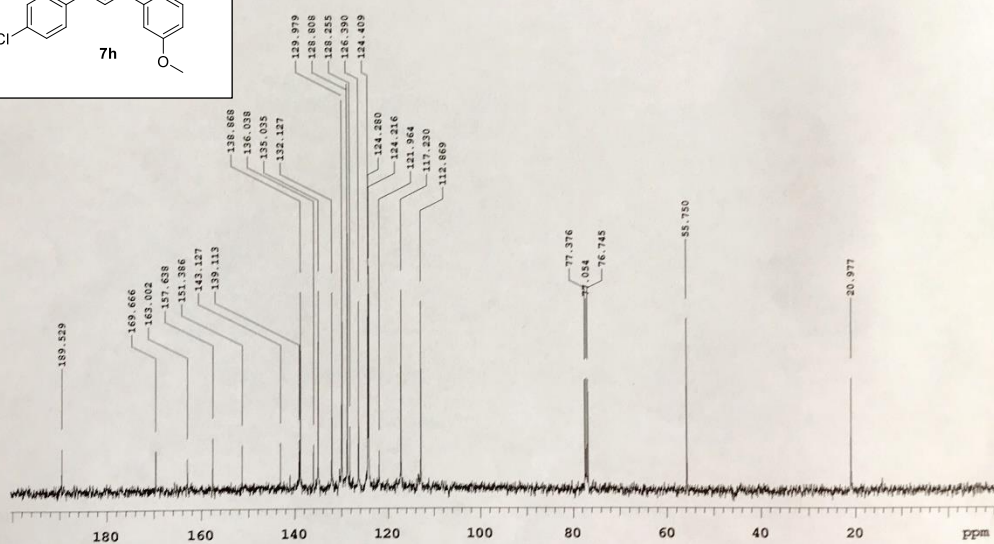



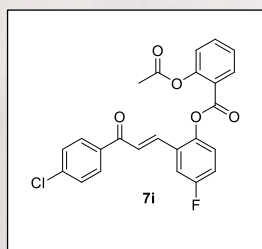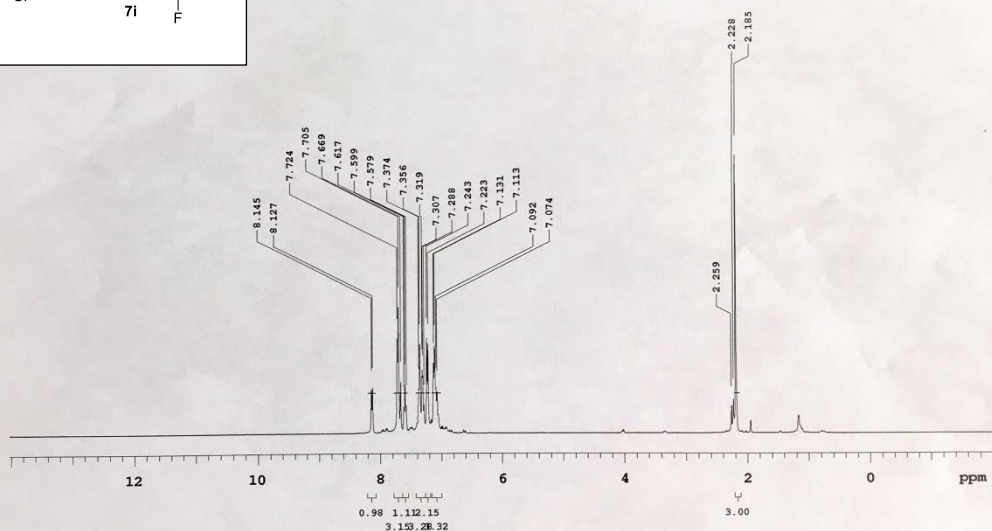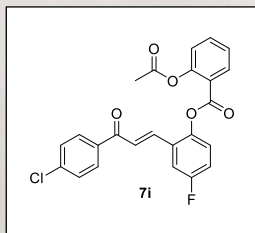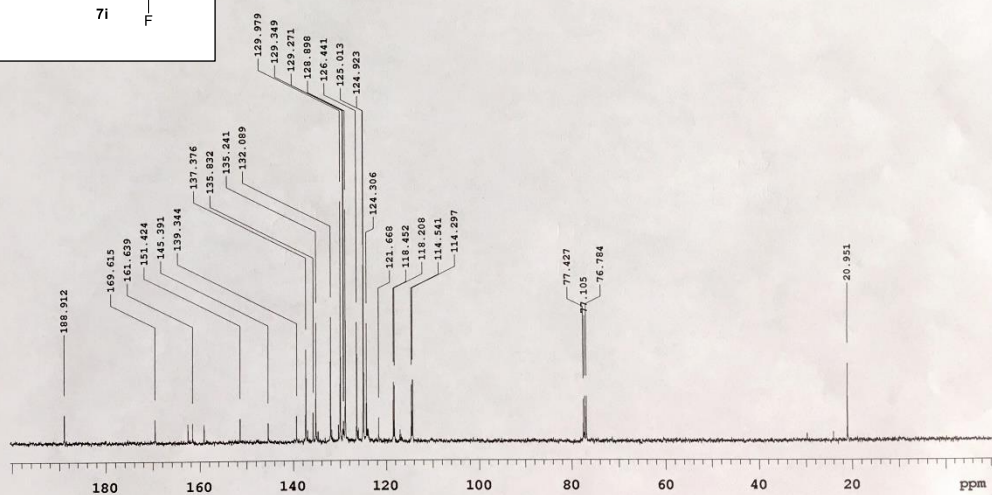

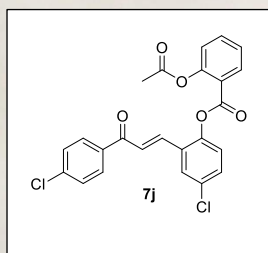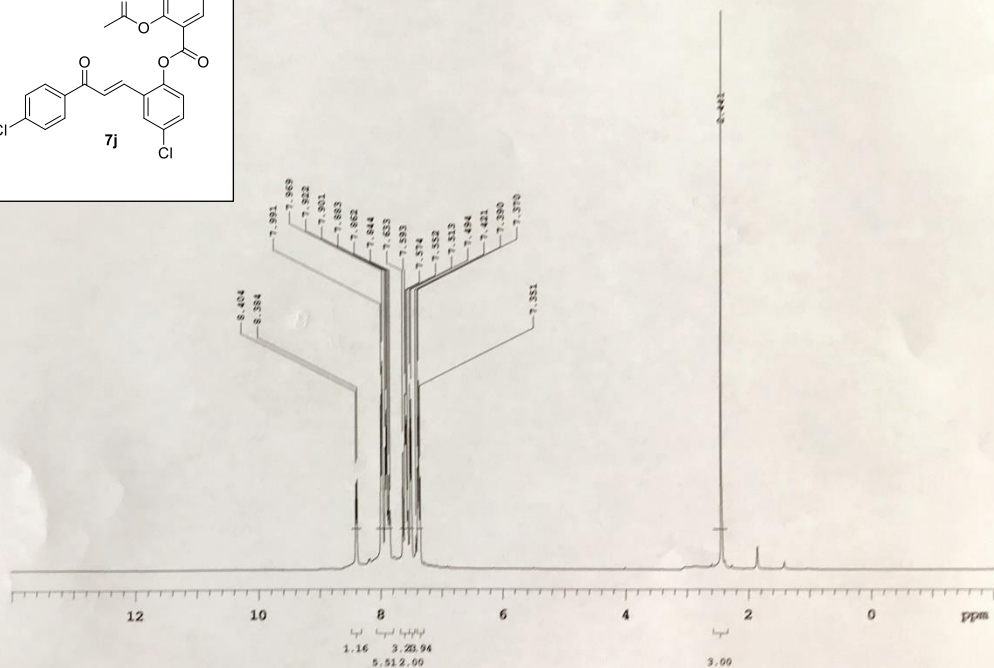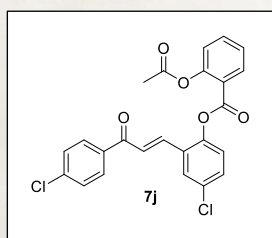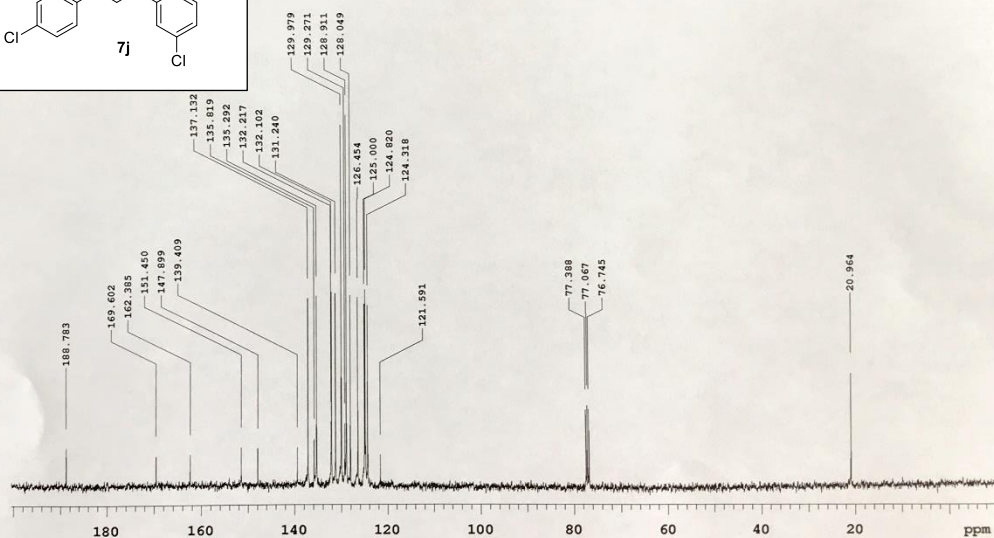



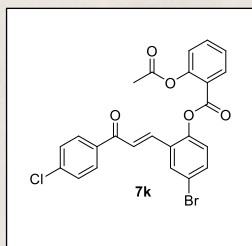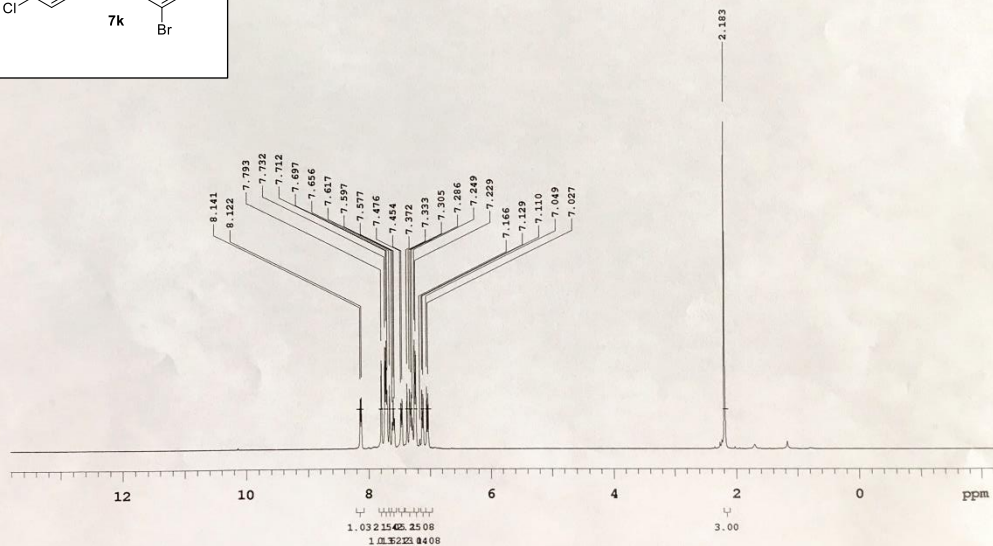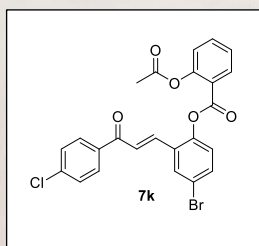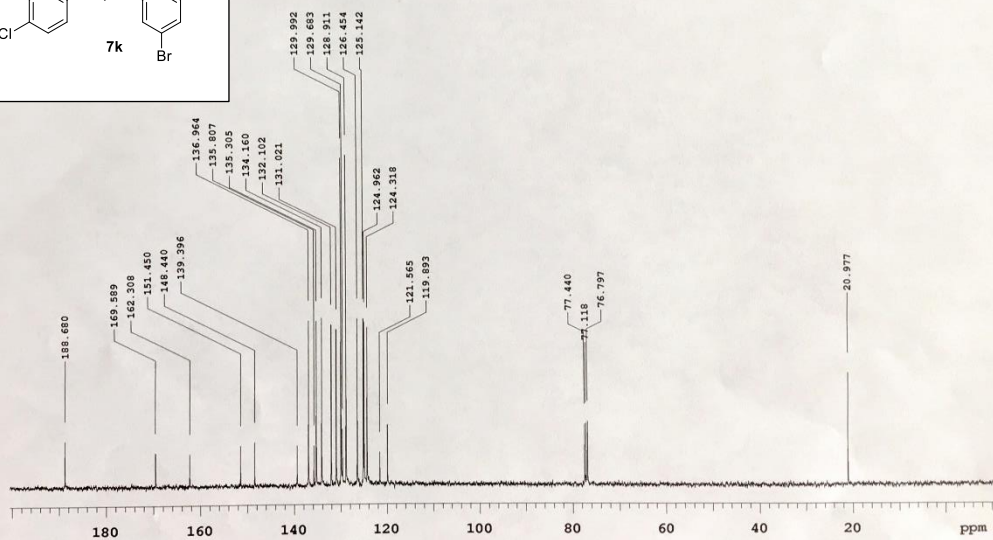

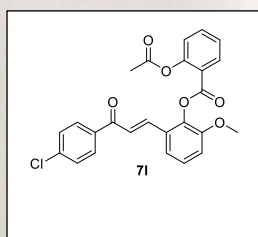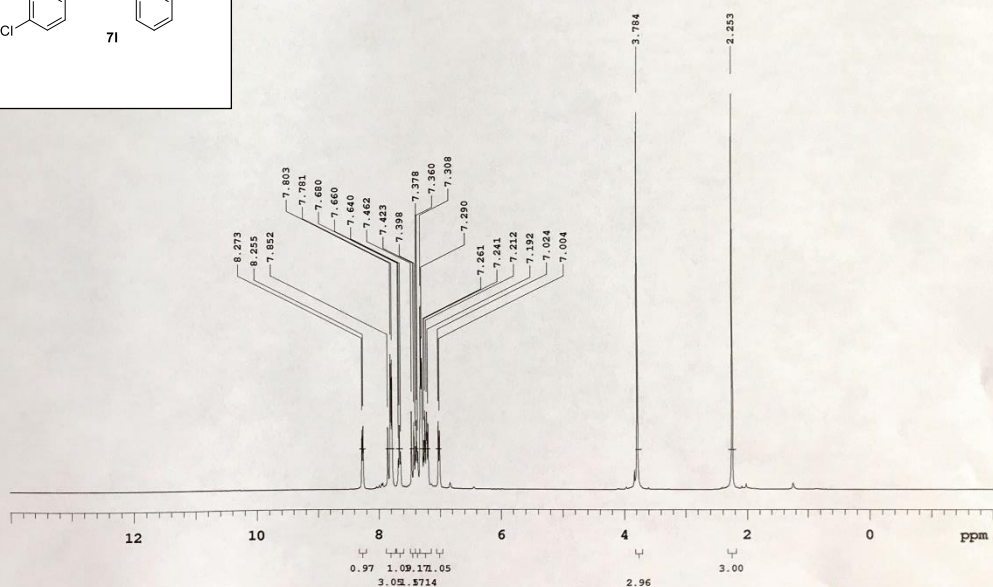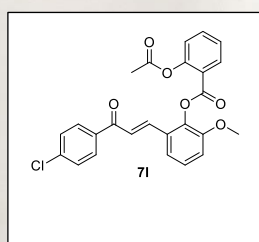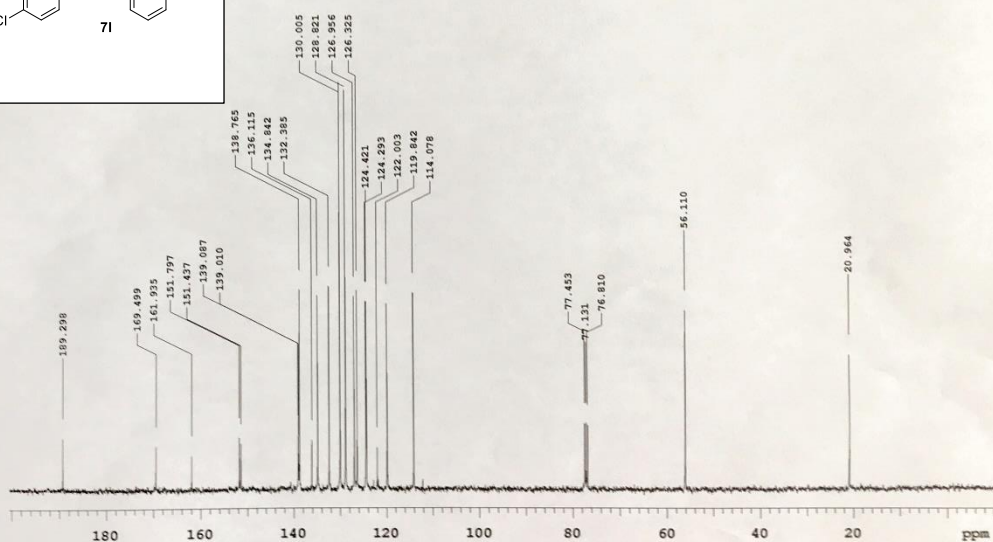

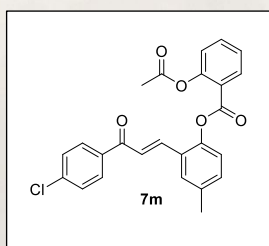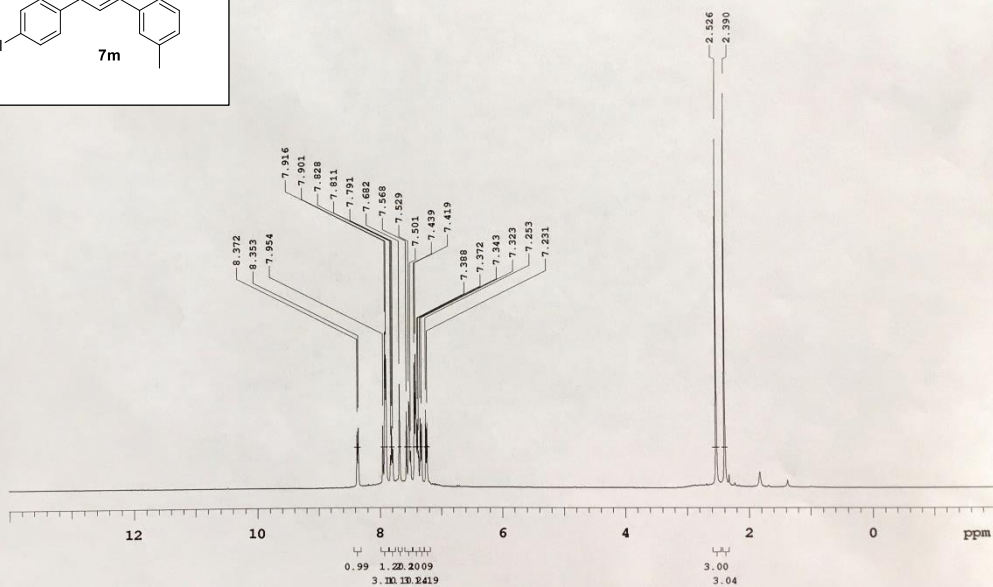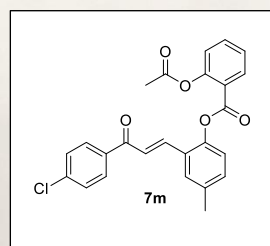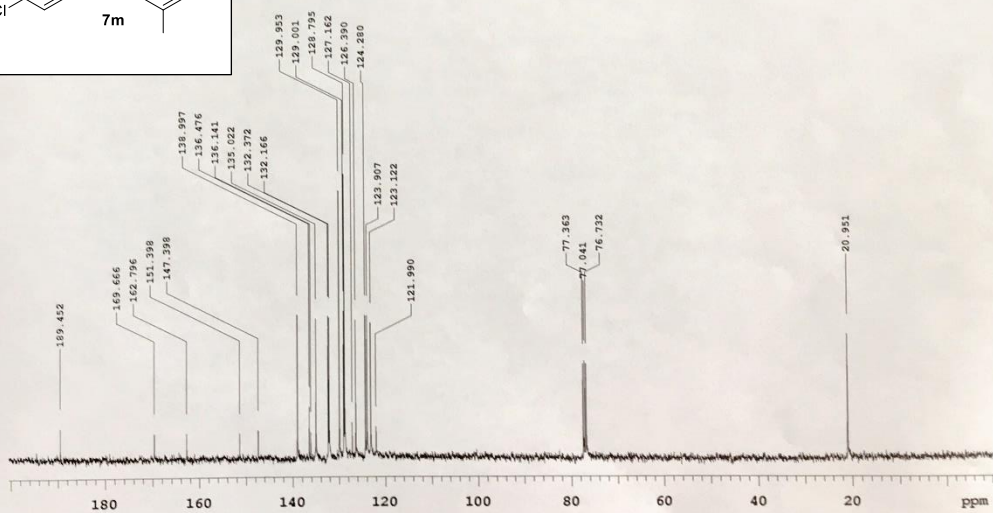

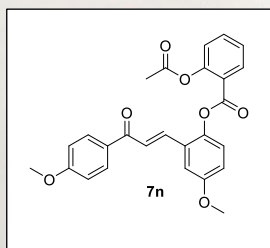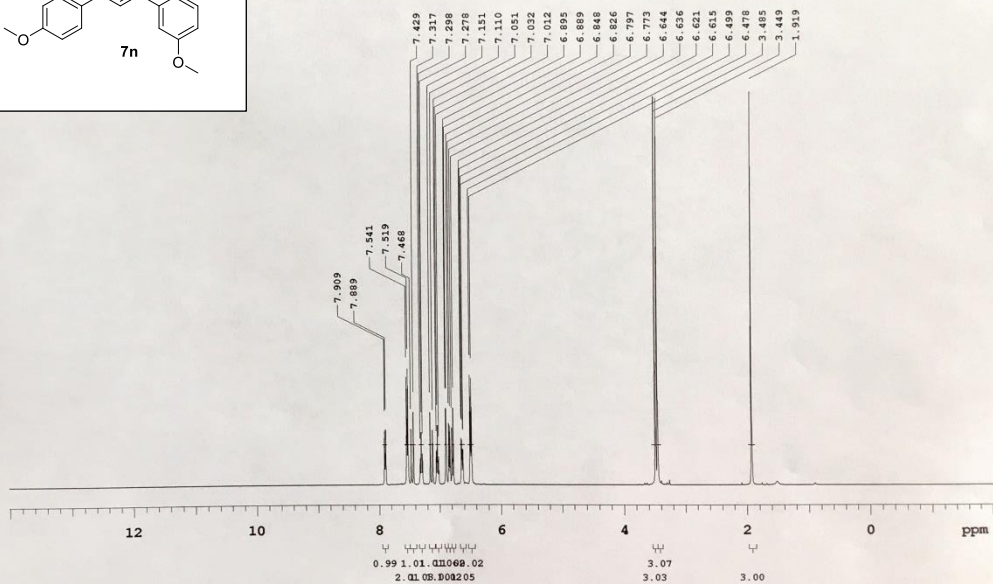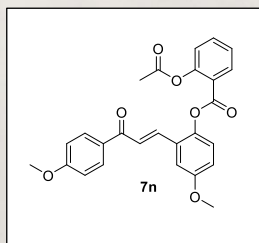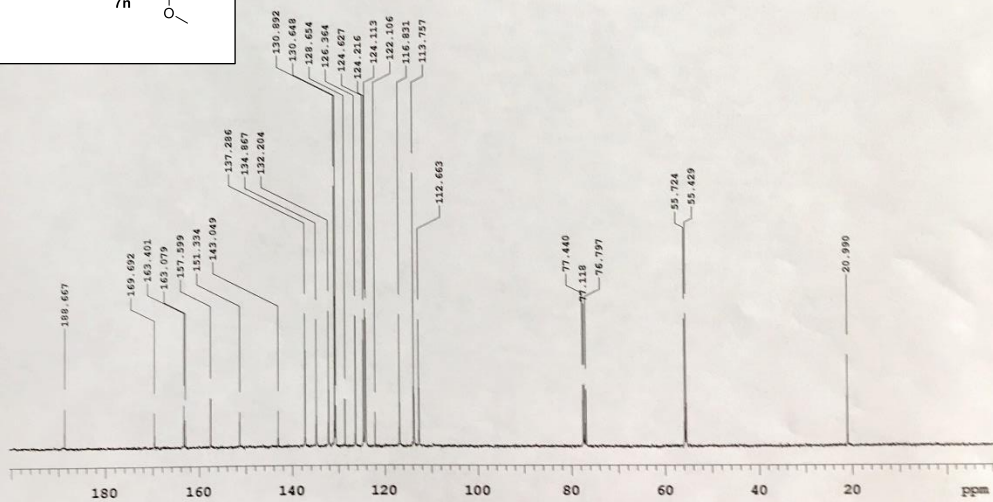



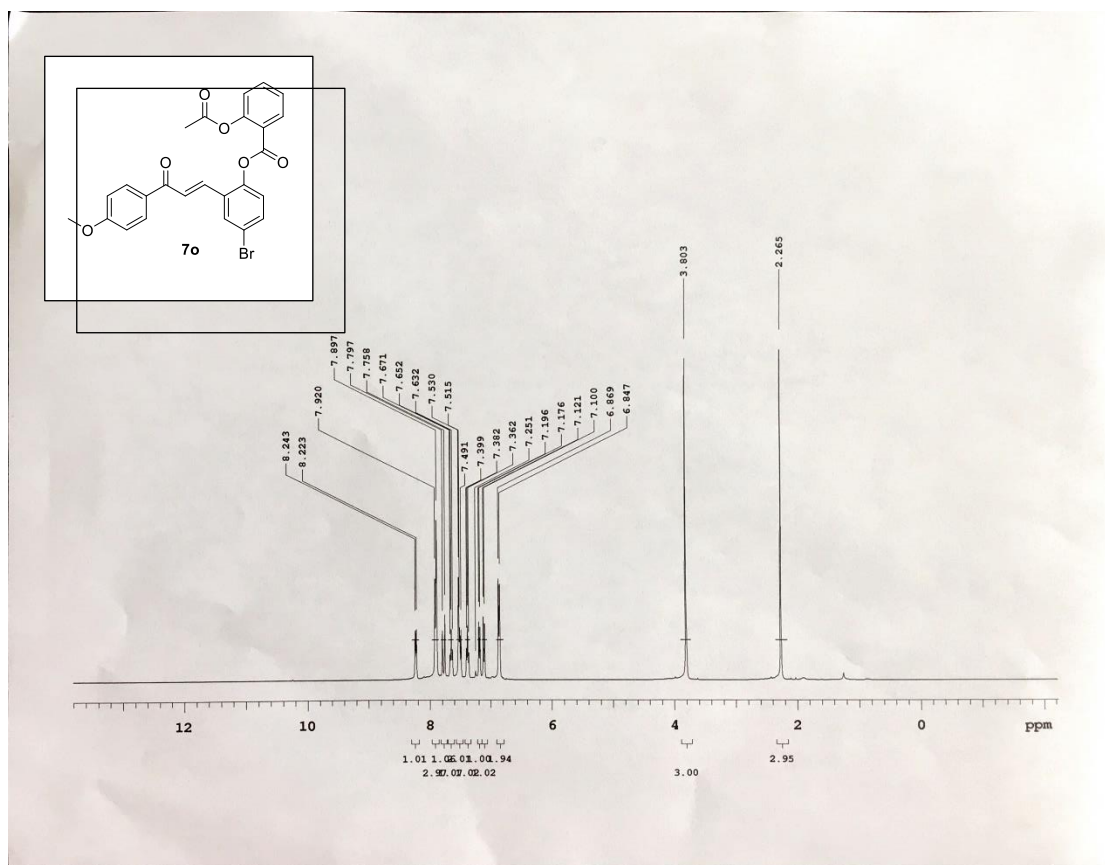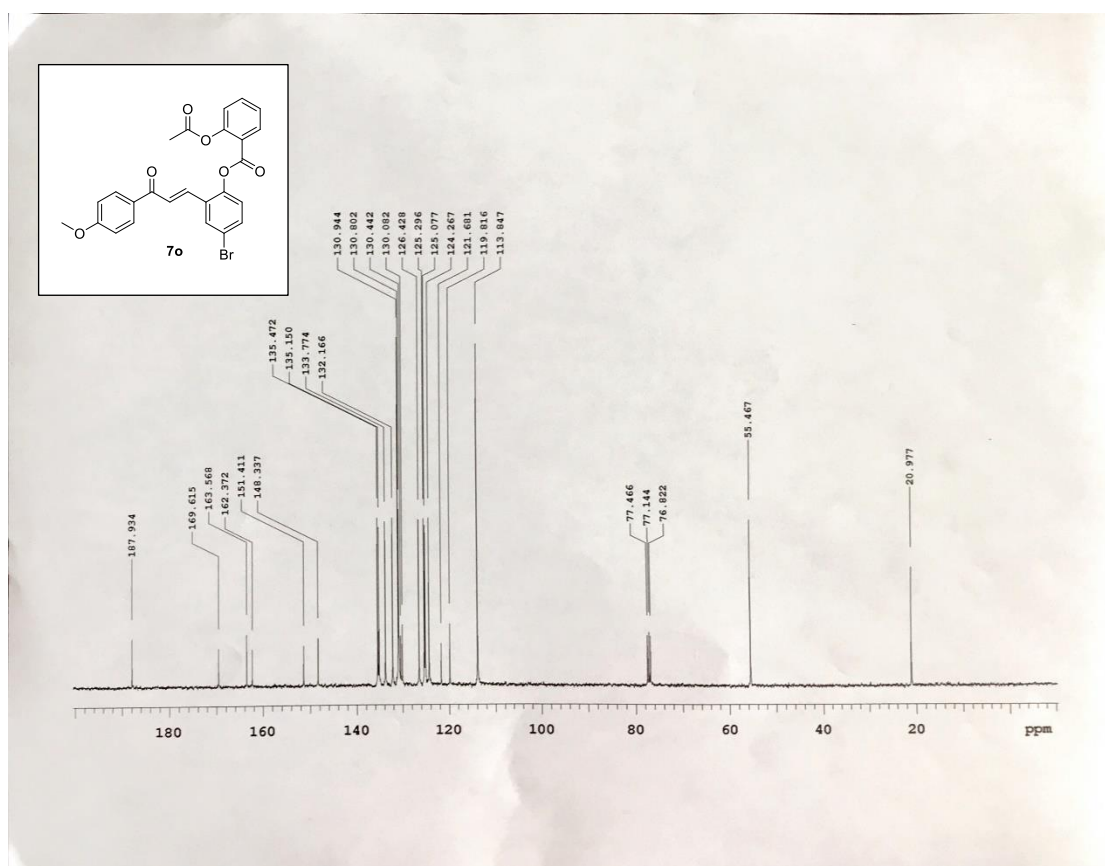

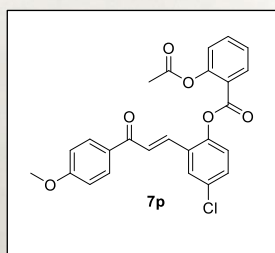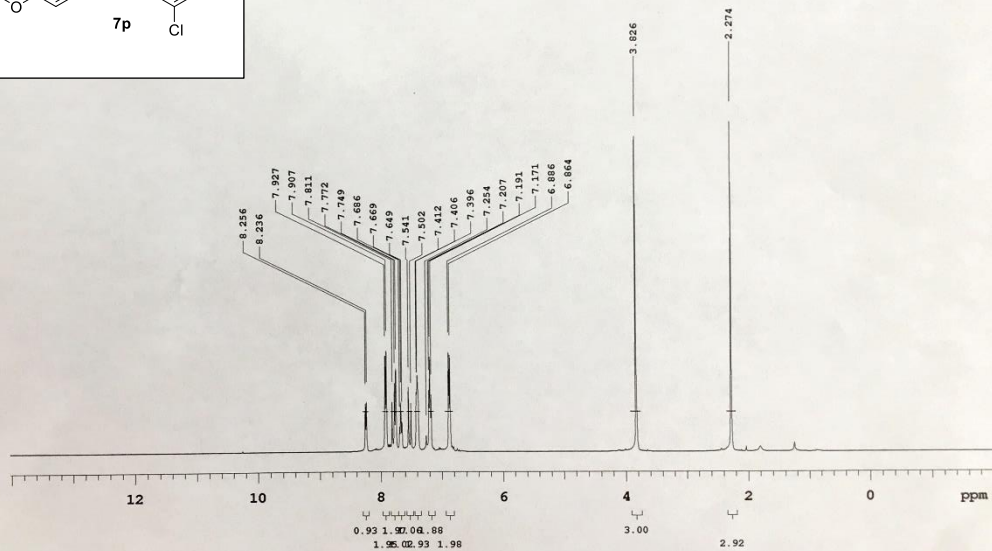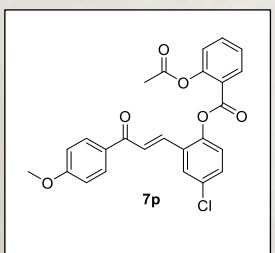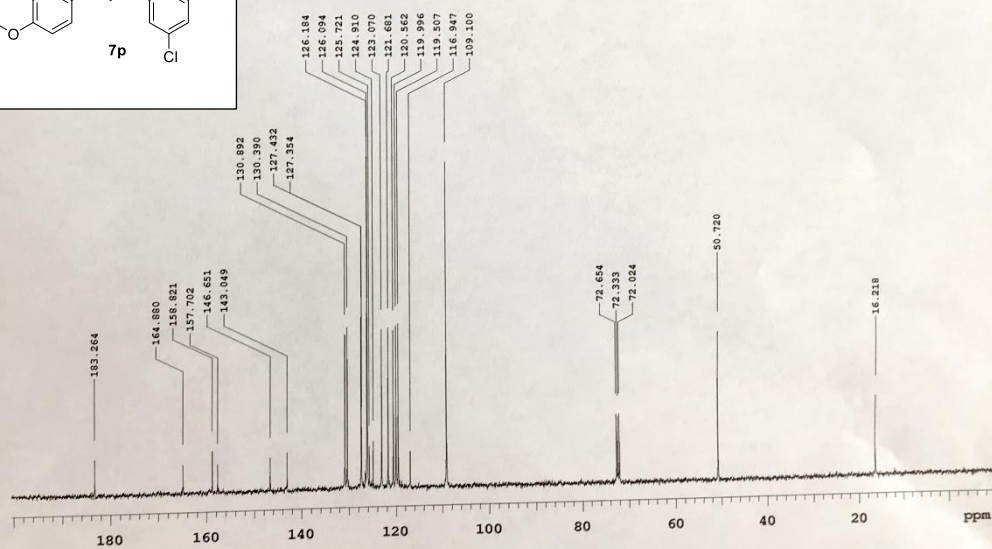

Supplement: c8md00284c1.pdf [file c8md00284c1.pdf]
